# Supplementary material for: Impact of mechanical calibration variations on USP prednisone PVT with standard and apex vessels
Source: Royal Society of Chemistry journal article supplement (doi:10.1039/d4ay02008a), 2025-01-01
Supplement: d4ay02008a1.xlsx [file d4ay02008a1.xlsx]

## Sheet: No Tilt
	Percent Dissolved Average
Vessel	Standard	Standard	Standard	Standard	Standard	Apex	Apex	Apex	Apex	Apex
Verticality	90	90	90	90	90	90	90	90	90	90
Height	0	2	2	-2	-2	0	2	2	-2	-2
Time	50 RPM	51 RPM	49 RPM	51 RPM	49 RPM	50 RPM	51 RPM	49 RPM	51 RPM	49 RPM
0	0	0	0	0	0	0	0	0	0	0
10	34.9648	35.8687	33.7877	35.6333	30.3129	72.9327	79.5997	75.0609	75.899	73.1399
20	48.9673	50.5587	47.2158	49.8619	45.6432	99.177	99.9303	98.951	99.8173	99.7797
30	53.3367	55.1823	52.1784	54.3254	50.9542	102.058	103.179	101.861	102.859	102.934
45	56.6419	58.7512	55.7473	58.3275	55.0317	102.605	103.603	103.094	103.782	104.017
60	59.3351	60.7758	58.3275	59.6458	57.5459	103.546	105.091	103.311	104.535	104.836
75	64.5425	70.3808	68.8836	73.978	66.1339	103.772	105.044	102.878	104.912	105.034
	Standard deviation
0	0	0	0	0	0	0	0	0	0	0
10	3.11412	2.58045	2.17271	5.10774	2.93225	7.05868	4.74187	6.50073	6.7812	4.81989
20	2.12899	2.34576	2.03448	2.98054	1.98087	2.524	1.54738	1.61324	1.10016	1.26139
30	1.5983	1.90695	1.75487	2.1236	1.99081	1.77593	1.39853	1.23327	1.23359	0.822123
45	1.984	1.7199	1.83435	1.94084	2.46506	1.84129	0.958635	1.82991	1.39991	1.3238
60	2.03026	1.78072	2.37496	2.75777	1.95512	1.80049	1.12623	0.959392	1.24576	1.05725
75	6.55497	8.0899	12.7055	12.269	7.52007	1.84192	0.610349	1.09253	1.15753	1.12571
	Geometric Mean
0	0	0	0	0	0	0	0	0	0	0
10	34.8434	35.7859	33.7211	35.2975	30.1726	72.6318	79.469	74.7803	75.6202	72.9877
20	48.9261	50.5105	47.1755	49.7807	45.6041	99.1468	99.9194	98.939	99.8118	99.7724
30	53.3149	55.1529	52.151	54.2873	50.9189	102.044	103.17	101.854	102.852	102.931
45	56.6098	58.7288	55.7193	58.2978	54.9814	102.59	103.599	103.08	103.773	104.009
60	59.3025	60.7527	58.2827	59.5856	57.5159	103.532	105.085	103.307	104.528	104.832
75	64.2513	69.9628	67.934	73.0749	65.7528	103.757	105.042	102.872	104.906	105.029
	Coefficient of Variation (%CV)
0	0	0	0	0	0	0	0	0	0	0
10	8.46698	7.31241	6.42213	14.5285	10.6296	9.5827	5.81941	9.67951	9.01531	6.99219
20	4.44965	4.50361	4.53218	5.97421	4.51512	2.64218	1.04648	1.4648	1.14291	1.25822
30	3.1238	3.3724	3.481	3.82888	3.94933	1.65614	1.19435	1.10768	1.26039	0.784843
45	3.6997	2.72027	3.41282	3.43161	4.59715	1.77358	0.902341	1.65859	1.40273	1.12855
60	3.5732	2.87617	4.24488	4.94316	3.36377	1.56363	0.945788	0.94805	1.24994	0.897696
75	10.1738	11.7841	17.1819	17.0962	11.6758	1.78958	0.607231	1.08901	1.13765	1.1072

## Sheet: Sheet2
	Prednisone Apex Vessel 8mm 49 RPM 1 Degree Tilted Dissolution				Prednisone Apex Vessel 8mm 51 RPM 1 Degree Tilted Dissolution				Prednisone Apex Vessel 12 mm 49 RPM 1 Degree Tilted Dissolution				Prednisone Apex Vessel 12 mm 51 RPM 1 Degree Tilted Dissolution				Prednisone Standard Vessel 23 mm 49 RPM 1 Degree Tilted Dissolution				Prednisone Standard Vessel 23 mm 51 RPM 1 Degree Tilted Dissolution				Prednisone Standard Vessel 27 mm 49 RPM 1 Degree Tilted Dissolution				Prednisone Standard Vessel 27 mm 51 RPM 1 Degree Tilted Dissolution
Time (min)	Mean % Dissolved	SD	Geometric mean	%CV	Mean % Dissolved	SD	Geometric mean	%CV	Mean % Dissolved	SD	Geometric mean	%CV	Mean % Dissolved	SD	Geometric mean	%CV	Mean % Dissolved	SD	Geometric mean	%CV	Mean % Dissolved	SD	Geometric mean	%CV	Mean % Dissolved	SD	Geometric mean	%CV	Mean % Dissolved	SD	Geometric mean	%CV
0	0	0	0	0	0	0	0	0	0	0	0	0	0	0	0	0	0	0	0	0	0	0	0	0	0	0	0	0	0	0	0	0
10	72.8951	10.8	72.0231	17.2928	76.0967	6.53646	75.8324	9.22588	78.724	6.74447	78.4448	7.63948	76.238	6.84696	75.9421	9.3621	35.7934	2.35086	35.7251	6.41364	39.513	3.52167	39.3702	8.22543	38.1099	2.9747	38.0079	7.88828	37.9404	3.32935	37.802	7.9674
20	96.917	4.1961	96.8311	4.06876	98.1694	2.24063	98.1454	2.35614	97.9246	2.32754	97.8989	2.43009	98.1882	1.60323	98.1762	1.64075	49.2969	3.4249	49.1907	6.86836	52.6398	4.36341	52.4605	9.11397	51.717	2.57544	51.6594	5.13711	52.6963	3.12574	52.6071	6.30924
30	102.03	1.78221	102.016	1.82888	102.04	0.875736	102.036	0.903813	100.495	2.11422	100.475	2.11002	101.352	1.53139	101.342	1.50735	54.5232	3.12481	54.442	5.89699	58.045	2.86154	57.9792	4.70162	56.2182	2.57492	56.1653	4.6989	57.2352	2.23148	57.1943	4.15683
45	103.659	1.33819	103.651	1.3404	103.367	1.23453	103.361	1.24171	102.294	1.99159	102.276	1.63153	102.294	1.88252	102.278	1.56474	58.1486	2.94055	58.0824	5.003	61.096	2.75531	61.0385	4.26434	59.7871	2.88113	59.7253	4.94734	60.5404	2.39004	60.4962	4.15605
60	103.932	1.47134	103.923	1.48329	103.744	1.14779	103.738	1.14506	102.529	1.33646	102.521	1.12552	102.614	1.39936	102.605	1.31295	60.4745	3.17298	60.402	4.81113	63.0452	2.69402	62.9928	3.61156	61.5857	2.77895	61.5303	4.5577	62.5462	2.03333	62.5153	3.4323
75	104.045	1.59549	104.034	1.59723	104.177	1.08827	104.172	1.09015	103.123	1.70725	103.11	1.46981	102.718	1.41493	102.709	1.26303	78.3944	12.5837	77.4081	17.5493	75.2398	11.0195	74.535	12.3844	78.0931	13.7735	77.0326	17.8364	78.9312	9.25106	78.4508	9.49768
